# Supplementary material for: The SCottish Alcoholic Liver disease Evaluation: A Population-Level Matched Cohort Study of Hospital-Based Costs, 1991-2011
Source: PLoS One. 2016 Oct 26;11(10):e0162980. doi: 10.1371/journal.pone.0162980 (PMC5082635; doi:10.1371/journal.pone.0162980)
Supplement: S5 Appendix — (XLSX) [file pone.0162980.s005.xlsx]

## Sheet: Sheet1
S5 Appendix: Modelling of rate of readmissions (negative binomial model)
		IRR	95% CI		p-value				IRR	95% CI		p-value
	Incident ALD group							Year of discharge
	with decompensation	1.2758	1.22	1.33	<0.001			1992	1.05576	0.935417	1.19159	0.4
	hosp with, not for, ALD	1.01883	1.01969	1.01797	<0.001			1993	1.03197	0.913538	1.16575	0.6
	Sex							1994	1.03423	0.916981	1.16648	0.6
	Women	0.842769	0.817513	0.868806	<0.001			1995	1.17509	1.04756	1.31814	0.006
	Age group (years)							1996	1.09788	0.98081	1.22893	0.1
	40-49	0.917674	0.876037	0.961291	<0.001			1997	1.11386	0.996132	1.24551	0.06
	50-59	0.858187	0.81959	0.898602	<0.001			1998	1.12831	1.00905	1.26166	0.03
	60-69	0.919397	0.874849	0.966214	0.001			1999	1.12547	1.00712	1.25773	0.04
	70+	0.968123	0.908657	1.03148	0.3			2000	1.21816	1.09067	1.36055	<0.001
	SIMD 2012 fifths							2001	1.28971	1.15708	1.43755	<0.001
	2	0.999398	0.962904	1.03727	0.9			2002	1.2935	1.15909	1.44348	<0.001
	3	0.923864	0.885106	0.964319	<0.001			2003	1.2354	1.10831	1.37706	<0.001
	4	0.949084	0.902544	0.998023	0.04			2004	1.33383	1.19781	1.48529	<0.001
	least deprived	0.915967	0.865765	0.969079	0.002			2005	1.36285	1.22454	1.51678	<0.001
	Health board							2006	1.33771	1.20198	1.48877	<0.001
	Ayrshire&Arran	0.985391	0.927775	1.04659	0.6			2007	1.36695	1.22798	1.52165	<0.001
	Borders	0.789562	0.692512	0.900214	<0.001			2008	1.36019	1.2227	1.51314	<0.001
	Dumfries&Galloway	0.886921	0.79257	0.992504	0.04			2009	1.46991	1.31937	1.63763	<0.001
	Fife	0.861459	0.801008	0.926472	<0.001			2010	1.4844	1.32946	1.6574	<0.001
	Forth Valley	0.861978	0.800575	0.928092	<0.001			2011	1.60714	1.42895	1.80755	<0.001
	Grampian	0.825738	0.778888	0.875406	<0.001
	Highland	0.766293	0.71164	0.825142	<0.001
	Lanarkshire	0.97061	0.925351	1.01808	0.2
	Lothian	0.971687	0.928899	1.01645	0.2
	Orkney	0.736838	0.525886	1.03241	0.08
	Shetland	0.829411	0.607842	1.13175	0.2
	Tayside	0.930521	0.87552	0.988978	0.02
	Western Isles	0.736163	0.602564	0.899382	0.003
	Comorbidities
	Alcohol related	0.894718	0.866664	0.92368	<0.001
	Diabetes	1.27399	1.1944	1.35888	<0.001
	Cancer	1.60226	1.48302	1.73108	<0.001
	COPD	1.2032	1.144	1.26547	<0.001
	Chronic Heart Failure	1.03168	0.943474	1.12814	0.5
	Atrial Fibrillation	1.05937	0.978885	1.14646	0.2
	Essential Hypertension	1.14101	1.085	1.1999	<0.001
	Renal Failure	1.05874	0.980653	1.14304	0.1
	Coronary Heart Disease	1.2395	1.16859	1.31471	<0.001
	Pulmonary Embolism&DVT	1.18196	1.06654	1.30987	0.001
	Cerebrovascular Disease	1.03128	0.951675	1.11754	0.5
	Depression	0.987299	0.886677	1.09934	0.8
The reference values are as shown below:
Sex: Men
Age Group: <40 years
Year of admission: 1991
SIMD 2012 fifths: most deprived fifths
Comorbidities - not having that particular comorbidity
Incident ALD group - ALD without decompensation
Year of discharge - 1991
Group - controls
Although Health Boards are included in the models they are not discussed in this article.
