# Supplementary material for: The SCottish Alcoholic Liver disease Evaluation: A Population-Level Matched Cohort Study of Hospital-Based Costs, 1991-2011
Source: PLoS One. 2016 Oct 26;11(10):e0162980. doi: 10.1371/journal.pone.0162980 (PMC5082635; doi:10.1371/journal.pone.0162980)
Supplement: S6 Appendix — (XLSX) [file pone.0162980.s006.xlsx]

## Sheet: Sheet1
S6 Appendix: Modelling pre-incident daily costs (generalised linear model, log link)
Pre-incidence daily costs are the sum of costs per person for all admissions before the incident admission divided by the number
of days of observation before the incident admission.
		Cooefficient	95% CI		p-value
	Case	1	1	1	<0.001
	Sex
	Women	1	1	1	0.184
	Age group (years)
	40-49	1	1	1	<0.001
	50-59	1	1	1	<0.001
	60-69	1	1	1	<0.001
	70+	1	1	1	<0.001
	SIMD 2012 fifths
	Most deprived	1	1	1	<0.001
	2	1	1	1	<0.001
	3	1	1	1	<0.001
	4	1	1	1	<0.001
		Coefficient	95% CI		p-value
	Year of admission
	1992	1	1	1	0.683
	1993	1	1	1	0.056
	1994	1	1	1	0.21
	1995	1	1	1	0.079
	1996	1	1	1	0.032
	1997	1	1	1	0.083
	1998	1	1	1	0.056
	1999	1	1	1	0.056
	2000	1	1	1	0.517
	2001	1	1	1	0.427
	2002	1	1	1	0.315
	2003	1	1	1	0.241
	2004	1	1	1	0.464
	2005	1	1	1	0.785
	2006	1	1	1	0.869
	2007	1	1	1	0.873
	2008	1	1	1	0.867
	2009	1	1	1	0.691
	2010	1	1	1	0.26
	2011	1	1	1	0.146
	Constant	1	1	1	<0.001
The reference values are as shown below:
Sex: Men
Age Group: <40 years
Year of admission: 1991
SIMD 2012 fifths: least deprived fifth
Comorbidities - not having that particular comorbidity
Incident ALD group - ALD without decompensation
Year of discharge - 1991
Group - controls
Although Health Boards are included in the models they are not discussed in this article.
